# Supplementary material for: Streptococcus parasuis, an Emerging Zoonotic Pathogen, Possesses the Capacity to Induce Cerebral Inflammatory Responses
Source: MDPI journal article supplement (doi:10.3390/pathogens12040600), 2023-04-15
Supplement: s1 [file s1]

Table S1. The presence of 129 putative virulence genes of *S. suis* in the genomes of three *S. parasuis* clinical strains.

|                         | BS26 | BS27 | NN1 |
|-------------------------|------|------|-----|
| <i>purD</i>             | +    | +    | +   |
| 05SSU0053               |      |      |     |
| <i>adcR</i>             | +    | +    | +   |
| <i>impdh2</i>           | +    | +    | +   |
| <i>EF-G</i>             | +    | +    | +   |
| <i>sspep</i>            |      |      |     |
| <i>pgk</i>              | +    | +    | +   |
| <i>glnA</i>             | +    | +    | +   |
| <i>ef</i>               |      |      |     |
| <i>Hp197</i>            |      |      |     |
| <i>dppIV</i>            |      |      |     |
| copper-exporting ATPase | +    | +    | +   |
| <i>treR</i>             | +    | +    | +   |
| HP0245                  |      |      |     |
| glutamate dehydrogenase | +    | +    | +   |
| <i>Hp272</i>            |      |      |     |
| <i>adhE</i>             | +    | +    | +   |
| 38 kDa-1                | +    | +    | +   |
| 38 kDa-2                |      |      |     |
| <i>hrcA</i>             | +    | +    | +   |
| <i>grpE</i>             | +    | +    | +   |
| <i>perR</i>             |      |      |     |
| <i>Tig</i>              | +    | +    | +   |
| 103/adhesion protein    |      |      |     |
| <i>htpS</i>             |      |      |     |
| <i>fba</i>              | +    | +    | +   |
| <i>codY</i>             | +    | +    | +   |
| <i>luxS</i>             |      |      |     |
| <i>stp</i>              |      |      |     |
| <i>stk</i>              |      |      |     |
| <i>vasr</i>             |      |      |     |
| <i>BgaC</i>             |      |      |     |
| <i>tran</i>             |      |      |     |
| SSU05_0473              |      |      |     |
| <i>srtF</i>             |      |      |     |
| collagenase             |      |      |     |
| peptidase               | +    | +    | +   |
| <i>EF-Tu</i>            | +    | +    | +   |
| <i>pk</i>               | +    | +    | +   |
| <i>ides</i>             |      |      |     |
| permease                |      |      |     |
| <i>gntR</i>             |      |      |     |
| <i>neuB</i>             |      |      |     |

|                                         |   |   |   |
|-----------------------------------------|---|---|---|
| <i>neuC</i>                             |   |   |   |
| <i>Flps</i>                             |   |   |   |
| <i>arginine<br/>deminase<br/>system</i> |   |   |   |
| <i>arcH</i>                             |   |   |   |
| <i>argR</i>                             |   |   |   |
| <i>dltA</i>                             |   |   |   |
| 05SSU0660                               |   |   |   |
| <i>mrp</i>                              |   |   |   |
| <i>sspA</i>                             |   |   |   |
| <i>clpX</i>                             | + | + | + |
| <i>guaA</i>                             | + | + | + |
| SpyM3-<br>0908                          |   |   |   |
| <i>nisK</i>                             |   |   |   |
| <i>nisR</i>                             |   |   |   |
| <i>hhly3</i>                            |   |   | + |
| <i>spI</i>                              |   |   |   |
| <i>salR</i>                             |   |   |   |
| <i>salK</i>                             |   |   |   |
| <i>traG</i>                             |   |   |   |
| <i>Ssads</i>                            |   |   |   |
| <i>IgA1</i>                             |   |   |   |
| <i>relQ</i>                             |   |   |   |
| <i>rex</i>                              |   |   |   |
| <i>srtA</i>                             |   |   |   |
| HP1083                                  | + | + | + |
| <i>cdd</i>                              | + | + | + |
| <i>ciaH</i>                             |   |   |   |
| <i>ciaR</i>                             |   |   |   |
| <i>pept</i>                             | + | + | + |
| <i>prsa</i>                             |   |   |   |
| <i>pepf</i>                             | + | + | + |
| <i>autolysin</i>                        |   |   |   |
| SSU05_131<br>1                          |   |   |   |
| <i>covR</i>                             |   |   |   |
| <i>sao</i>                              |   |   |   |
| <i>ccpA</i>                             | + | + | + |
| <i>sly</i>                              |   |   |   |
| <i>feoB</i>                             |   |   |   |
| <i>fbp</i>                              | + | + | + |
| <i>eno</i>                              | + | + | + |
| HP1538                                  |   |   |   |
| <i>clpP</i>                             | + | + | + |
| <i>gtfA</i>                             | + | + | + |
| <i>lgt</i>                              | + | + | + |
| <i>pgdA</i>                             |   |   |   |
| <i>pgm</i>                              | + | + | + |
| <i>ihk</i>                              |   |   |   |
| <i>irr</i>                              |   |   |   |

|                                                           |   |   |   |
|-----------------------------------------------------------|---|---|---|
| <i>ofs</i>                                                |   |   |   |
| <i>yzpa</i>                                               |   |   |   |
| <i>dpr</i>                                                | + | + | + |
| <i>hamI</i>                                               |   |   |   |
| <i>HP1717</i>                                             |   |   |   |
| <i>mannose-specific<br/>EIIAB:<br/>Phosphotransferase</i> | + | + | + |
| <i>ManM</i>                                               | + | + | + |
| <i>ManN</i>                                               | + | + | + |
| <i>ManO</i>                                               |   |   |   |
| <i>SerS</i>                                               | + | + | + |
| <i>virA</i>                                               |   |   |   |
| <i>kar</i>                                                | + | + | + |
| <i>IgdE</i>                                               |   |   |   |
| <i>scrB</i>                                               | + | + | + |
| <i>scrA</i>                                               | + | + | + |
| <i>oppa</i>                                               | + | + |   |
| <i>1910HR</i>                                             |   |   |   |
| <i>1910HK</i>                                             |   |   |   |
| <i>gp92</i>                                               |   |   |   |
| <i>endo D</i>                                             |   |   |   |
| <i>purA</i>                                               | + | + | + |
| <i>SsnA</i>                                               |   |   |   |
| <i>mutT</i>                                               | + | + | + |
| <i>pnuc</i>                                               |   |   |   |
| <i>nadR</i>                                               | + | + | + |
| <i>sbp2</i>                                               |   |   |   |
| <i>rgg</i>                                                |   |   |   |
| <i>ApuA</i>                                               | + | + | + |
| <i>troA</i>                                               |   |   |   |
| <i>revS</i>                                               |   |   |   |
| <i>relA</i>                                               | + | + | + |
| <i>sntA</i>                                               |   |   |   |
| <i>sbp1</i>                                               |   |   |   |
| <i>pili</i>                                               |   |   |   |
| <i>collagen-binding<br/>protein</i>                       |   |   |   |
| <i>gdpp</i>                                               |   |   |   |
| <i>gidA</i>                                               | + | + | + |
| <i>guaB</i>                                               | + | + | + |
