# Supplementary material for: Streptococcus parasuis, an Emerging Zoonotic Pathogen, Possesses the Capacity to Induce Cerebral Inflammatory Responses
Source: MDPI journal article supplement (doi:10.3390/pathogens12040600), 2023-04-15
Supplement: s1 [file s1]

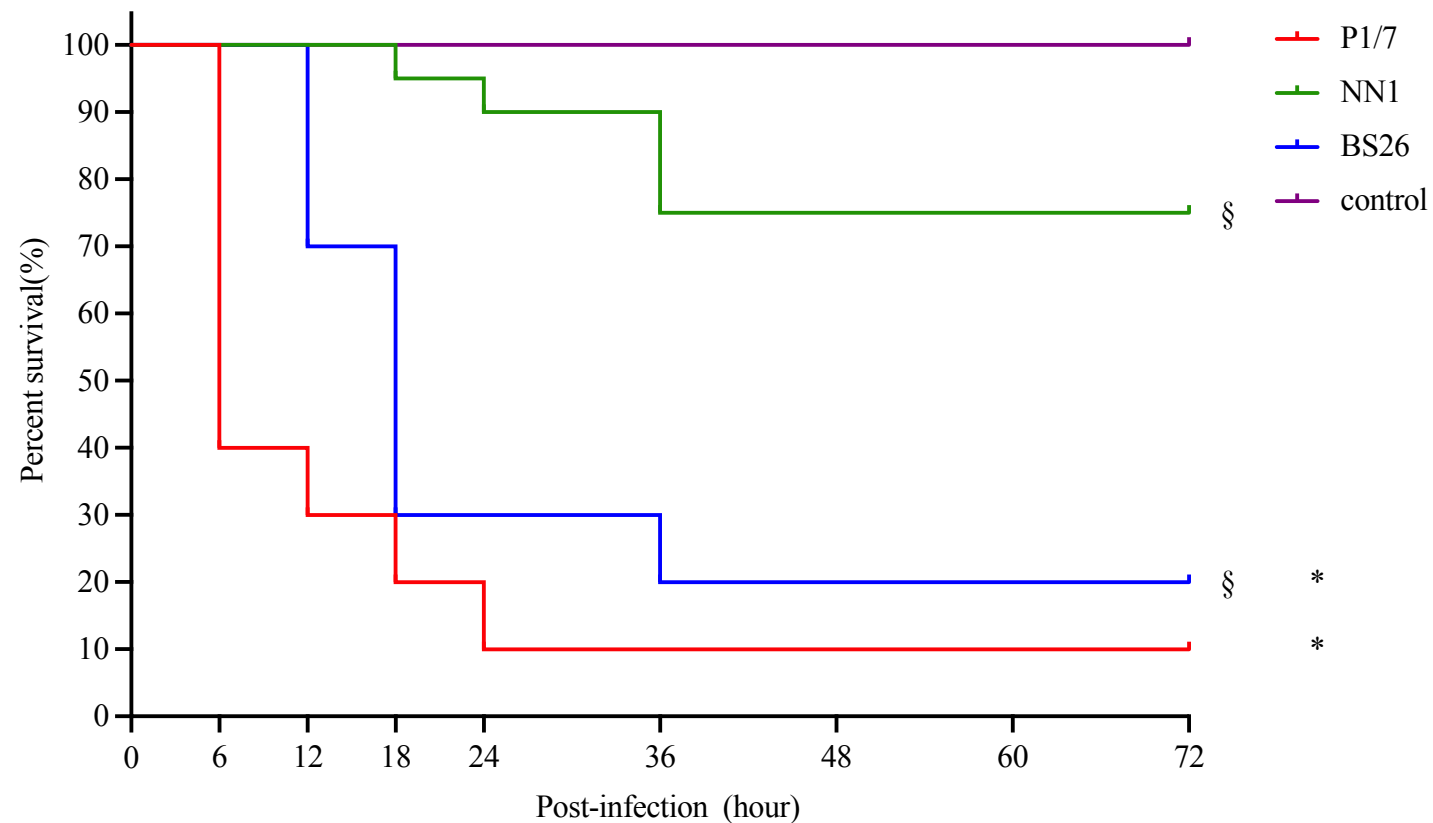

Figure S2. Survival curves of mice injected with  $5 \times 10^7$  CFU of live *S. parasuis* strains BS26 and NN1, *S. suis* strain P1/7, and THB only as control group.
