# Supplementary figures and images for: Streptococcus parasuis, an Emerging Zoonotic Pathogen, Possesses the Capacity to Induce Cerebral Inflammatory Responses
Source: MDPI journal article supplement (doi:10.3390/pathogens12040600), 2023-04-15

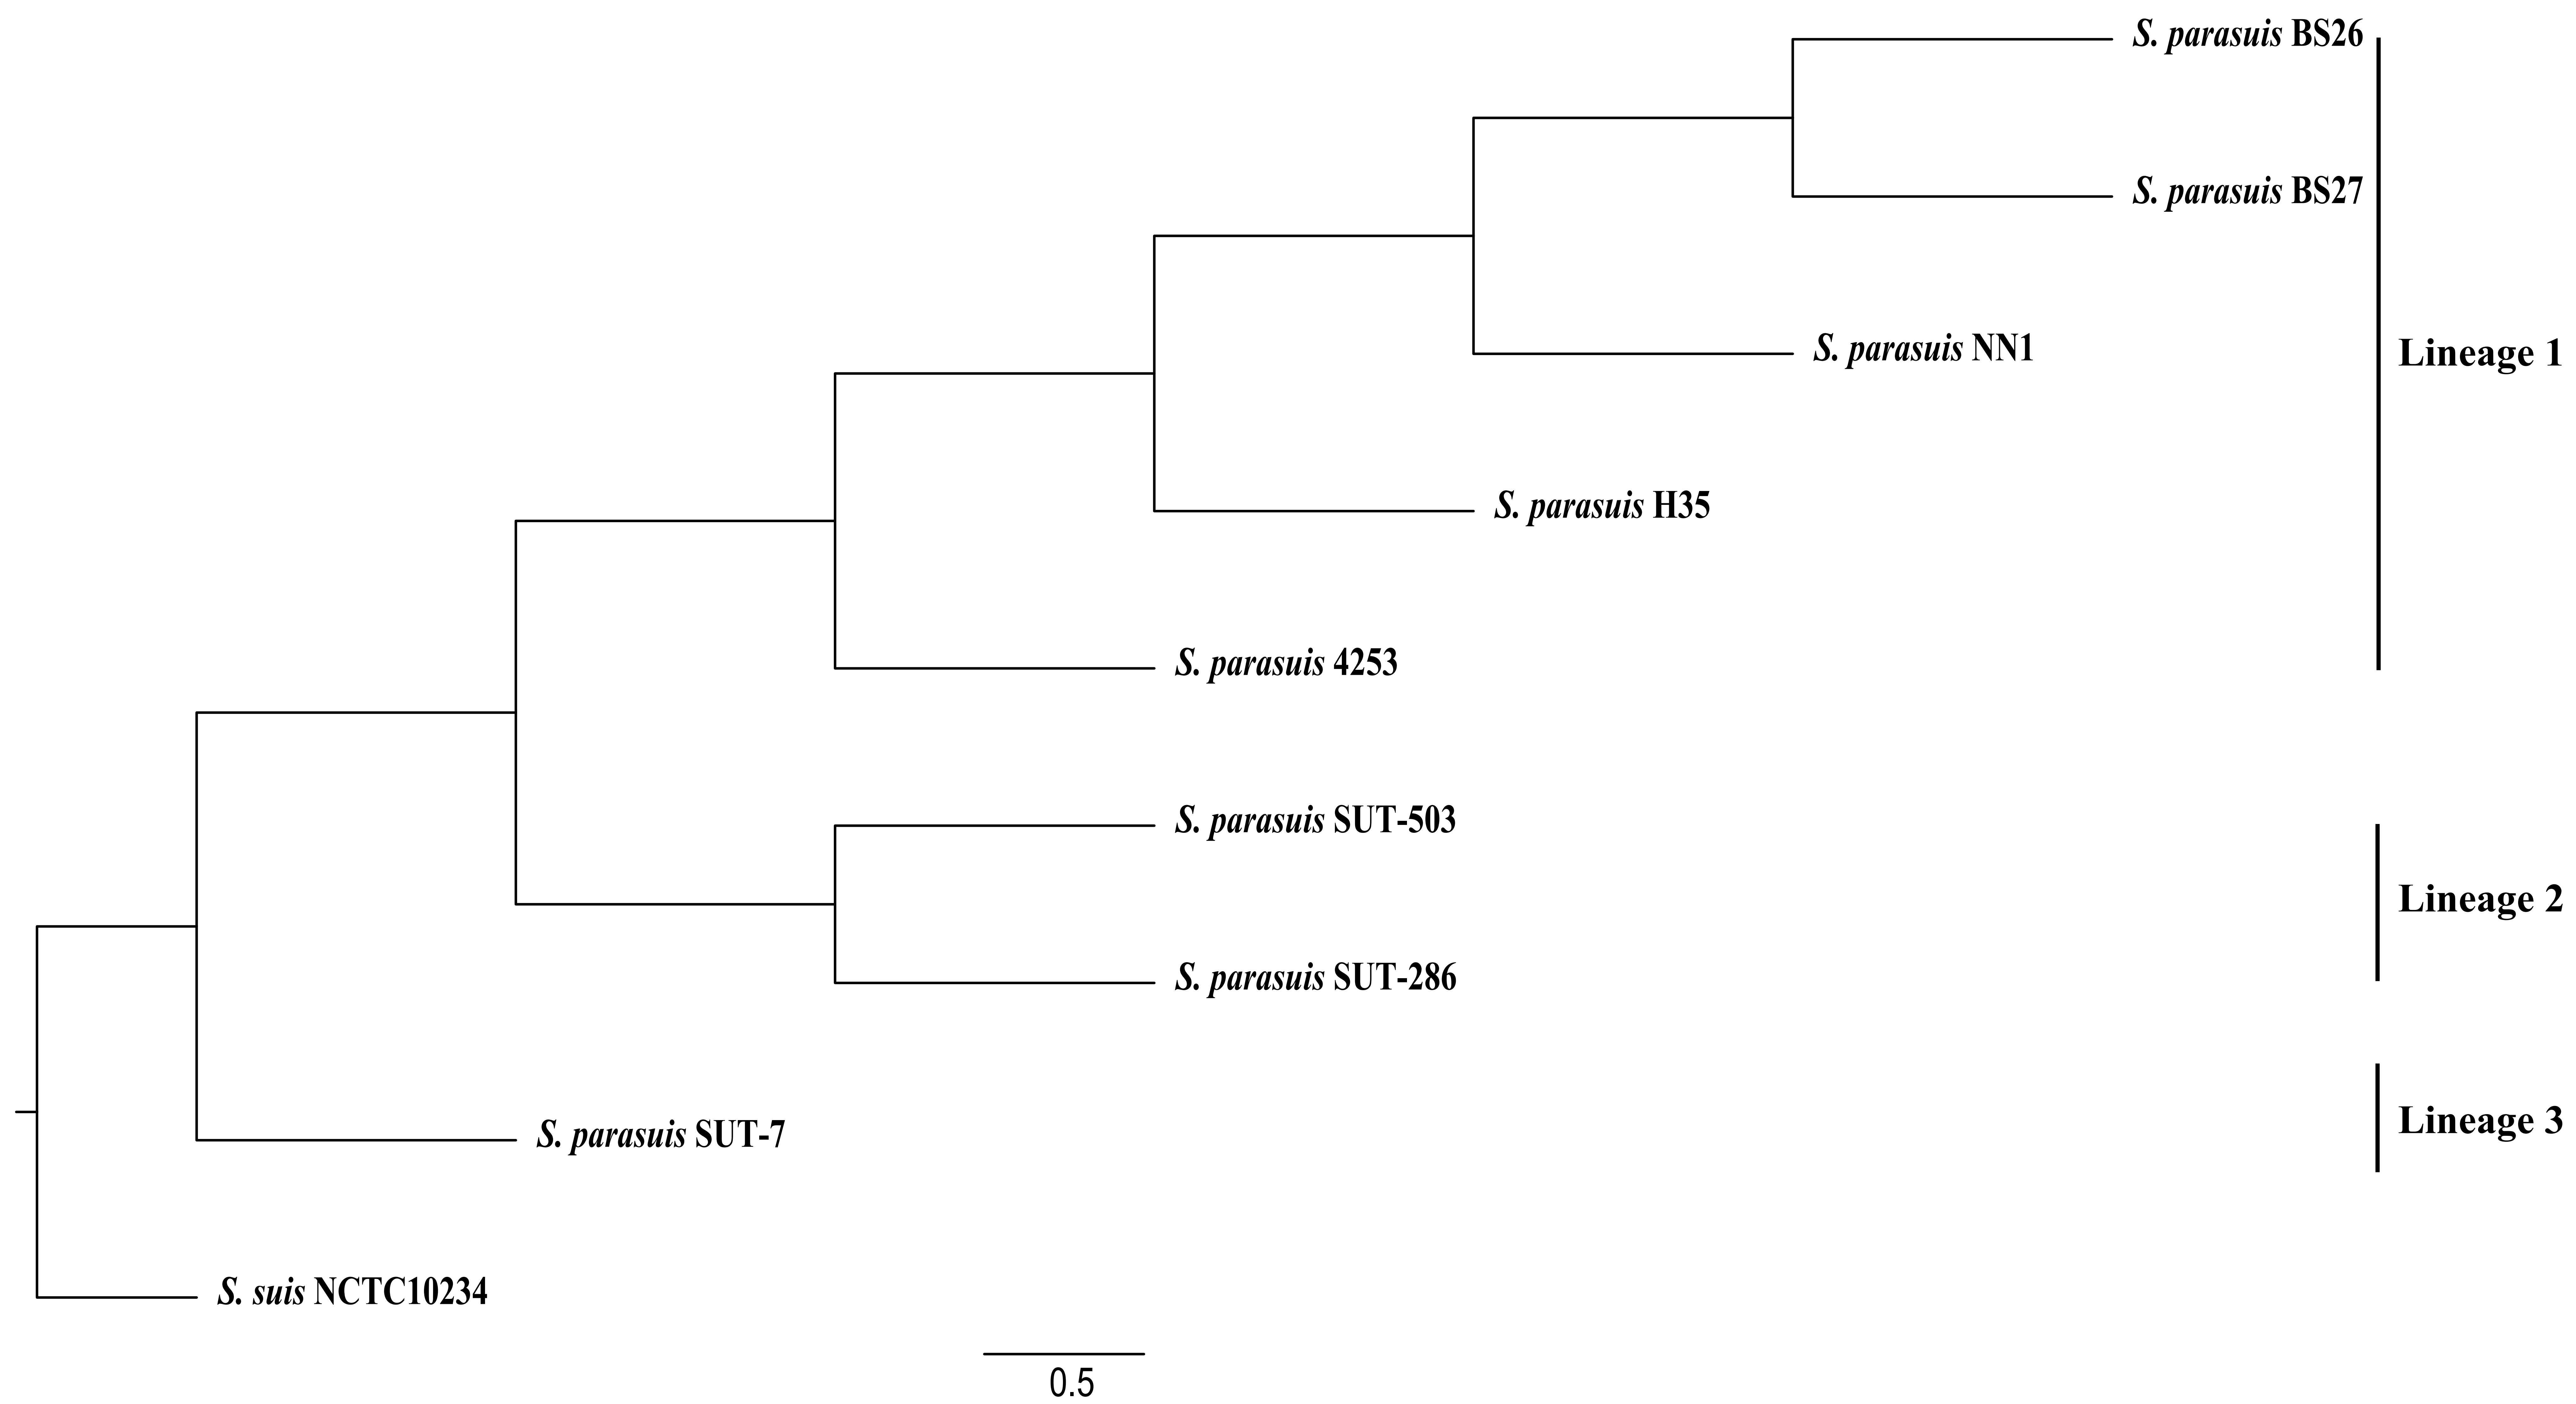

Figure S1. Core-genome phylogeny of nine Streptococcus genomes in the present study.

Supplement: s1 [file s1]
